# Supplementary material for: CRISPR/Cas9 Editing Sites Identification and Multi-Elements Association Analysis in Camellia sinensis
Source: Int J Mol Sci. 2023 Oct 18;24(20):15317. doi: 10.3390/ijms242015317 (PMC10607008; doi:10.3390/ijms242015317)
Supplement: Supplementary file 1 [file ijms-24-15317-s001.zip › Table S1.xlsx]

## Sheet: Table1
Table S1. Size of repeating unit types on each chromosome
	MNRs	DNRs	TNRs	TTRs	PNRs	HNRs	compound	compound*	ALL	length_chr(bp)	length_chr(Mb)
chr1	50880	23572	5196	1498	373	373	18378	1049	101319	222834174	222.834
chr2	49077	22755	4952	1471	376	307	18001	967	97906	213184539	213.185
chr3	44139	20195	4531	1266	307	276	16074	844	87632	187390788	187.391
chr4	45134	21062	4713	1283	364	293	16737	877	90463	196298966	196.299
chr5	43595	20251	4374	1203	291	285	15712	857	86568	194877589	194.878
chr6	44235	19684	4396	1301	342	317	15699	821	86795	181129525	181.13
chr7	42601	19693	4269	1310	302	310	15305	860	84650	187104375	187.104
chr8	34347	16191	3512	1042	250	220	12369	716	68647	163071019	163.071
chr9	39192	18150	3820	1163	283	231	14092	729	77660	165547432	165.547
chr10	38426	17602	3876	1154	270	237	13486	736	75787	167113155	167.113
chr11	28695	13521	3010	829	207	205	10199	538	57204	123678568	123.679
chr12	34981	16929	3533	1020	297	209	12677	680	70326	162709580	162.71
chr13	31762	14776	3214	867	262	211	11447	646	63185	136142203	136.142
chr14	31631	14802	3299	922	267	179	11778	586	63464	133855197	133.855
chr15	27394	12704	2808	790	194	196	9764	546	54396	119080728	119.081
Contig	94288	43082	9517	2656	781	646	33830	1886	186686	384739993	384.74
