# Supplementary material for: CRISPR/Cas9 Editing Sites Identification and Multi-Elements Association Analysis in Camellia sinensis
Source: Int J Mol Sci. 2023 Oct 18;24(20):15317. doi: 10.3390/ijms242015317 (PMC10607008; doi:10.3390/ijms242015317)
Supplement: Supplementary file 1 [file ijms-24-15317-s001.zip › Table S2.xlsx]

## Sheet: Mono
Mononucleotide repeat motif information identified in C.sinensis genome
Motifs	Number
T	332691
A	332135
C	7881
G	7670

## Sheet: Di
Dinucleotide repeat motif information identified in C.sinensis genome
Motifs	Number
AT	86214
TA	54784
AG	48174
TC	40757
CT	34262
GA	27161
TG	7138
AC	6382
CA	5076
GT	4290
GC	382
CG	349

## Sheet: Tri
Trinucleotide repeat motif information identified in C.sinensis genome
Motifs	Number
AAT	9786
TTA	6209
ATT	5746
CCA	2951
GGT	2850
TAT	2562
ATA	2538
TTC	2448
AAG	2247
GAA	1996
TCT	1975
TAA	1917
TGG	1779
CAC	1653
AGA	1528
GTG	1485
ACC	1433
CTT	1333
TCA	1311
TTG	1188
CCT	1154
TGA	1091
CAA	909
GAG	904
GAT	882
GGA	822
ATC	741
AAC	732
ATG	564
CAT	537
CTC	514
GTT	475
TGT	475
ACA	471
TCC	436
AGG	418
AGC	249
CAG	223
TGC	222
CTG	200
GCT	171
GCA	169
CCG	144
GAC	141
GGC	141
TAG	138
CGC	132
AGT	118
ACT	109
GTA	103
TAC	99
GTC	98
CGG	95
TCG	88
CTA	83
GCC	71
CGA	61
GCG	55
ACG	25
CGT	25

## Sheet: Tetra
Tetranucleotide repeat motif information identified in C.sinensis genome
Motifs	Number
AAAT	4885
TTTA	2998
ATTT	1903
TTAT	1581
AATA	1108
TATT	770
ATAA	709
TAAA	615
AATT	342
ATAG	295
TTTG	282
AAAC	240
AAAG	217
CACC	196
TATC	195
GGTG	188
TTTC	183
TATG	114
ATAC	95
ATCT	95
TTAA	95
AAGA	88
TAAT	87
GTTT	80
AGAC	72
ACAA	68
CAAA	65
TCTG	65
TTCT	64
GAAA	60
TCTT	60
TGTT	60
ATTA	56
AACA	52
CTTT	52
GAGG	45
AGAA	43
CTAT	43
ACAT	40
CATA	40
TACA	40
AGAT	39
TCTA	39
TGTA	39
GTAT	37
CCAC	35
TTGT	35
ATGT	34
GATA	34
ACTT	31
CATG	30
AATC	26
CCTC	26
ATTG	25
GGAG	25
CTCA	24
AATG	23
CATT	23
CCCA	23
CCCT	23
TGTC	23
AAGT	22
GTGG	21
TAGA	21
TCAT	21
CAAT	20
CTAA	20
GAGT	20
TCCC	20
AACT	19
ATGA	19
CTCC	19
GTTA	19
TGAT	18
GGGA	17
GGGT	17
TAAC	17
ATCA	16
TTGG	16
TAAG	15
AGGG	14
CAAC	13
GGTT	13
GTGC	13
TGAA	13
TGGG	13
ACCC	12
GAAT	12
TTAG	12
ACCA	11
AGTG	11
ATGC	11
TCAC	10
TCCA	10
ATTC	9
CATC	9
GTGA	9
TGAG	9
TGCA	9
ACAG	8
ATGG	8
GTTG	8
ATCC	7
CACT	7
CCAA	7
CCAT	7
GAAG	7
GATG	7
GCAT	7
TAGT	7
TGGA	7
TTGA	7
AACC	6
AAGC	6
ACTA	6
ACTC	6
AGTT	6
CACG	6
CTTC	6
GCGT	6
TCAA	6
TGGT	6
ATCG	5
CCTT	5
CTAC	5
GATT	5
GCAA	5
GGAA	5
GGAT	5
TTCA	5
AAGG	4
CGAG	4
CGGA	4
GATC	4
TAGG	4
TCAG	4
TCCT	4
TGGC	4
TTGC	4
AGGC	3
CCGT	3
CGTG	3
GCCT	3
GGCC	3
TGAC	3
TTCC	3
ACGA	2
AGCT	2
AGGT	2
AGTC	2
CGAT	2
CTCG	2
CTGT	2
GAAC	2
GCAC	2
GCCA	2
GCCC	2
GCTG	2
GGCT	2
GGTA	2
GTAA	2
GTCA	2
GTCT	2
TACC	2
ACCG	1
ACTG	1
AGCA	1
AGCG	1
AGGA	1
AGTA	1
CAAG	1
CAGA	1
CAGC	1
CAGG	1
CCCG	1
CCGA	1
CCTA	1
CCTG	1
CGAC	1
CGCA	1
CGGG	1
CGGT	1
CTGC	1
CTTG	1
GACA	1
GACT	1
GAGC	1
GCAG	1
GCGG	1
GCTA	1
GCTC	1
GGAC	1
GGGC	1
GGTC	1
GTAG	1
GTTC	1
TCGA	1
TCGG	1
TCGT	1
TGCC	1
TGCG	1
TGCT	1

## Sheet: Penta
Pentanucleotide repeat motif information identified in C.sinensis genome
Motifs	Number
AAAAT	434
TTTTA	233
AAAAG	215
ATTTT	207
TTTTC	183
TTTAT	165
TTTTG	131
TTGGT	121
AAAAC	115
AAACC	114
AAATA	97
TAAAA	87
TTATT	82
TTTCT	79
AGAAA	71
AATAA	67
ATAAA	64
CTTTT	60
AACCA	56
TATTT	55
GAAAA	50
TTCTT	49
ATATT	46
CAAAC	46
GTTTG	46
AAAGA	39
GCTCG	39
CAAAA	36
TTTGG	36
CGAGC	34
GTTTT	33
AACCC	31
AATAT	31
TCTTT	31
CCAAA	29
TTTGT	29
AAGAA	28
ACCAA	28
TTGGG	28
ACAGA	26
ATTTA	24
CCAAC	24
CGGGG	24
TCTGT	24
GGTTT	23
GCCCC	22
AAACA	21
CCCAA	21
TAATA	21
CAACC	19
GGGTT	19
AAATT	18
GGTTG	18
TGTTT	18
ATTAA	17
ATTAT	15
GTGGG	15
AACAA	14
AACAG	13
ACAAA	13
TGGGT	13
AAATC	12
AGAGA	12
CCCCA	12
TATAT	12
TGGTT	12
TTGTT	12
AACGT	11
ACCCA	11
ACGTT	11
ATATA	11
CTCTC	11
GTTGG	11
AGCCC	10
CCCTC	10
CGACA	10
GCATC	10
GCTTG	10
GGGTG	10
TCTTC	10
AAGAG	9
ACAGT	9
ACCGA	9
AGGCG	9
CCCCT	9
CTCTT	9
CTTTC	9
GATGC	9
GGCTC	9
TAAAT	9
TATTA	9
TTGGA	9
AATCC	8
CAACT	8
CCCCG	8
CCGAG	8
GTTGA	8
TCGGT	8
TTCTC	8
TTGTG	8
AAATG	7
AATTT	7
ACACA	7
ATGCG	7
CAAGC	7
CCCAC	7
CTCAC	7
CTTCT	7
CTTGT	7
GAGAG	7
GTGTG	7
TCTCT	7
TTTCC	7
TTTGC	7
AATCA	6
AATTA	6
AGAAC	6
AGGGG	6
CACAC	6
CGGCT	6
GAGCC	6
GAGGG	6
GGCCC	6
GGTGG	6
TCTAC	6
AACAC	5
AACCG	5
ACAAT	5
ACCCC	5
AGCCG	5
ATTGA	5
ATTGG	5
CAAAT	5
CCAAG	5
CGAAT	5
CTCCT	5
CTCGG	5
CTTCA	5
GAAAG	5
GAACC	5
GAAGG	5
GAATG	5
GACCC	5
GAGAA	5
GCCTC	5
GGGAG	5
GGGGC	5
GGTGT	5
GTTCT	5
TGATT	5
TGGGG	5
TGTGG	5
TTAAT	5
TTATA	5
TTCCC	5
TTCTG	5
TTGGC	5
AATTC	4
ACAAG	4
AGAAG	4
AGACA	4
AGAGG	4
AGATC	4
AGGAG	4
ATAAT	4
ATATG	4
ATCAT	4
ATCCA	4
ATGGG	4
CAAAG	4
CACCA	4
CATCG	4
CCAAT	4
CCACA	4
CCACC	4
CCAGA	4
CCATA	4
CGATT	4
CGGGC	4
GAATC	4
GATGA	4
GGAAA	4
GGATG	4
GGCTT	4
GGGCT	4
GGGGA	4
GTAGA	4
GTGAA	4
GTTAT	4
TACTG	4
TATAA	4
TCATC	4
TCCCA	4
TGAGG	4
TGGAT	4
TTAGC	4
TTTAA	4
TTTGA	4
AAAGG	3
AACTC	3
AAGGA	3
AATAG	3
ACAAC	3
ACTAA	3
ACTCA	3
AGCAT	3
AGCCA	3
AGCTA	3
ATAGA	3
ATCTC	3
ATTCA	3
ATTTG	3
CAGTA	3
CATAT	3
CATCC	3
CATCT	3
CATGC	3
CCATC	3
CCCAT	3
CCCGA	3
CCTCC	3
CCTCG	3
CGTGT	3
CGTTT	3
GAAGA	3
GATAC	3
GCCCG	3
GCCGA	3
GCTTT	3
GGCGG	3
GGGCC	3
GGTGA	3
GTCTG	3
GTGGT	3
GTTCG	3
GTTTA	3
TAAAC	3
TAAGC	3
TCCAA	3
TCCCC	3
TCCTC	3
TCGTG	3
TCTAT	3
TCTCA	3
TCTCC	3
TCTTG	3
TGGCA	3
TGGTG	3
TGTAT	3
TGTTA	3
TGTTC	3
TTGAG	3
TTGTA	3
TTTCA	3
AAACT	2
AAAGC	2
AAGCT	2
AAGGG	2
AATCG	2
AATGC	2
ACAGC	2
ACCAC	2
ACCCG	2
ACGGG	2
ACTTC	2
AGGAA	2
ATACA	2
ATACC	2
ATAGG	2
ATGAG	2
ATGTG	2
CAATC	2
CATTA	2
CCATT	2
CCCGG	2
CCCTA	2
CCTAG	2
CCTCT	2
CCTTG	2
CGAAC	2
CGATG	2
CGCAT	2
CGCCC	2
CGCCT	2
CGGTT	2
CGTAT	2
CTAAC	2
CTAAG	2
CTAAT	2
CTCAA	2
CTTCC	2
GAAAT	2
GAACA	2
GACCA	2
GAGAT	2
GAGTT	2
GATGG	2
GATTC	2
GATTG	2
GATTT	2
GCACG	2
GCCCA	2
GCTTA	2
GGAGG	2
GGCAT	2
GGGAA	2
GTATT	2
GTCGG	2
GTGAG	2
GTGGA	2
GTTGT	2
TAATT	2
TATAC	2
TATCA	2
TATCC	2
TATGT	2
TCAAA	2
TCAAC	2
TCACC	2
TCATA	2
TCATT	2
TCCAC	2
TCGTT	2
TCTAA	2
TCTCG	2
TGAAA	2
TGAAT	2
TGATC	2
TGGAA	2
TGGCC	2
TGGGC	2
TGGTA	2
TGTCG	2
TGTGT	2
TGTTG	2
TTAGT	2
TTATG	2
TTCAA	2
TTCAT	2
TTCCT	2
TTCGG	2
TTGAA	2
TTGAT	2
TTGTC	2
AAAGT	1
AACTT	1
AAGAC	1
AAGAT	1
AAGCA	1
AAGGT	1
AATCT	1
ACACC	1
ACATA	1
ACATC	1
ACCAG	1
ACCCT	1
ACCGT	1
ACGAT	1
ACGTG	1
ACTCG	1
ACTCT	1
ACTGC	1
ACTGT	1
AGACC	1
AGACG	1
AGACT	1
AGAGC	1
AGAGT	1
AGCAG	1
AGCGG	1
AGGAT	1
AGGCT	1
AGGGA	1
AGTCA	1
AGTGC	1
AGTGG	1
ATAAC	1
ATCAG	1
ATCCC	1
ATCGG	1
ATCTG	1
ATGCA	1
ATGCC	1
ATGGA	1
ATGGC	1
ATGGT	1
ATGTT	1
ATTAC	1
ATTCC	1
ATTCG	1
ATTCT	1
ATTGC	1
ATTGT	1
ATTTC	1
CAAGA	1
CAATA	1
CAATG	1
CACAA	1
CACAG	1
CACAT	1
CACCC	1
CACGC	1
CACGG	1
CACTA	1
CACTT	1
CAGAA	1
CAGAG	1
CAGAT	1
CAGCC	1
CAGTG	1
CATAA	1
CATGA	1
CATGG	1
CATGT	1
CATTG	1
CCACG	1
CCACT	1
CCATG	1
CCCAG	1
CCCGC	1
CCCGT	1
CCCTT	1
CCGAC	1
CCGAT	1
CCGCT	1
CCGGT	1
CCGTA	1
CCGTG	1
CCTAT	1
CCTCA	1
CCTTA	1
CCTTC	1
CCTTT	1
CGACC	1
CGAGG	1
CGGCC	1
CGGGT	1
CGGTC	1
CTAGG	1
CTATA	1
CTATC	1
CTATG	1
CTCAT	1
CTCCC	1
CTCGT	1
CTCTG	1
CTGAC	1
CTGCA	1
CTGCT	1
CTGTA	1
CTGTT	1
CTTGC	1
CTTTG	1
GAAAC	1
GAATT	1
GACTC	1
GACTT	1
GAGGA	1
GAGGT	1
GAGTC	1
GATAA	1
GATAT	1
GATCT	1
GCAAA	1
GCAAG	1
GCACC	1
GCATG	1
GCCAC	1
GCCAT	1
GCCTA	1
GCGAG	1
GCTAA	1
GGAAT	1
GGACT	1
GGAGT	1
GGATT	1
GGCAA	1
GGCCG	1
GGCGT	1
GGCTG	1
GGGAT	1
GGGCA	1
GGGCG	1
GGGGT	1
GGGTC	1
GGTCG	1
GGTTA	1
GGTTC	1
GTAAG	1
GTATC	1
GTCAG	1
GTCCC	1
GTCGT	1
GTCTA	1
GTCTT	1
GTGGC	1
GTGTA	1
GTGTT	1
GTTCA	1
TAACA	1
TAGAA	1
TAGAT	1
TAGCC	1
TAGGA	1
TAGTA	1
TAGTC	1
TAGTT	1
TATAG	1
TATGG	1
TATTC	1
TATTG	1
TCAAT	1
TCACA	1
TCATG	1
TCCAG	1
TCCCT	1
TCCTT	1
TCGAA	1
TCGAG	1
TCGCC	1
TCGGC	1
TCTGG	1
TGAAG	1
TGAGT	1
TGATG	1
TGCAC	1
TGCAG	1
TGCAT	1
TGCCA	1
TGCCC	1
TGCCG	1
TGCTA	1
TGCTG	1
TGGAG	1
TGGCT	1
TGGGA	1
TGGTC	1
TGTAG	1
TGTCA	1
TGTCT	1
TGTGA	1
TTAAA	1
TTAGA	1
TTCGA	1
TTGCC	1
TTGCT	1
TTTAC	1

## Sheet: Hexa
Hexanucleotide repeat motif information identified in C.sinensis genome
Motifs	Number
AAAAAT	102
TTTTTA	73
AAAAAG	69
TTTTTG	67
TACTGT	62
AAAAGA	54
ATTTTT	53
TTTTAT	51
AAAAAC	50
TTTTTC	48
ATAAAA	45
AAAATA	43
GTAACA	41
CAGTAA	36
AACCCT	35
GAGAGG	35
TAAAAA	35
AAAACA	32
TTATTT	29
TTTATT	29
TTACTG	28
CCACCT	26
TTTCTT	26
CTTTTT	25
GGAGGT	24
TATTTT	23
TTCTTT	22
CAAAAA	21
TTAGGG	20
TCTTTT	18
TTTTCT	18
TTTTGT	18
AAATAA	17
ACAAAA	17
CTCTCC	16
TGGGTG	16
CACGGA	15
GGTGGC	15
TAAAAT	15
AAAATT	14
TGGAGG	14
TTTGTT	14
GAAAAA	13
GGAAAG	13
TTGTTT	13
TTTGCA	13
ACATCC	12
CATCTT	12
CCTCCA	12
GAAGAT	12
GTTAGG	12
TATCTA	12
AAAACC	11
AAATCA	11
AATAAA	11
GCCCAA	11
GGTGGA	11
TGGAGA	11
AAAAGC	10
AAACAA	10
AAAGAA	10
AATTCA	10
GGCGGT	10
TCATCT	10
TGGTGA	10
TTTAAT	10
TTTCCC	10
TTTGGT	10
TTTTGA	10
AAATTA	9
ACACCC	9
ACCATC	9
AGAGGG	9
AGGGTT	9
ATATAG	9
ATATCT	9
CACCAT	9
CACCTC	9
CCCACC	9
CCGTGT	9
GAGGTG	9
GGGTTT	9
GGTTAG	9
GTGGAG	9
GTGGCG	9
TATAGA	9
TCTCTT	9
TTTTCC	9
AACCCA	8
AATTTT	8
AGTTGG	8
ATTAAC	8
CAAGCC	8
CCCCCA	8
CCTCTC	8
CGTGTC	8
CTTGGG	8
GATTTT	8
GCCACC	8
GGGGGT	8
GTGGGA	8
TATATG	8
TCAAGC	8
TGATGG	8
TGTGGG	8
TTTGCT	8
AACAAA	7
AGCCAA	7
ATAGAT	7
ATTCAT	7
CAAATC	7
CACATC	7
CACCCA	7
CACCCT	7
CCACCC	7
CCATCA	7
CCCGCT	7
CCGCAA	7
CCTCTT	7
CGCCAC	7
CTCAAG	7
CTCAGC	7
CTCTCA	7
GAGAGT	7
GAGGCT	7
GATGGT	7
GCCTCA	7
GCTTGA	7
GGAAGA	7
GGAGAG	7
GTGTGC	7
TAGGGT	7
TCGCCA	7
TCTCCA	7
TCTTTC	7
TGGGCT	7
TTCTCT	7
AAGAAA	6
AATGTT	6
AATTTG	6
ACAGTA	6
ACATAA	6
ACCACT	6
ACTGTT	6
AGGAAG	6
AGGACG	6
AGGTGG	6
ATGTGG	6
ATTTGG	6
ATTTTG	6
CAAAAC	6
CAAAAT	6
CAAACC	6
CACACC	6
CCACCG	6
CCCAAA	6
CCCAAG	6
CCCCCT	6
CCTAAC	6
CTCCAC	6
CTTTCC	6
GAAAGT	6
GGAGGG	6
GGCGAT	6
GGCTTG	6
GGTGGG	6
GTGGCA	6
GTTGGA	6
GTTTTT	6
TATTGT	6
TCCCTC	6
TCTTCC	6
TGCTCC	6
TGGATG	6
TGGCGG	6
TGTGAG	6
TTGGGT	6
AAACAC	5
AAAGAG	5
AACACC	5
AAGTCC	5
AATGCA	5
ACCGCC	5
ACCTCC	5
ACTCTC	5
AGAAAA	5
AGAGAA	5
AGGGAG	5
ATGCAA	5
ATTTGC	5
CACCAA	5
CCCCGT	5
CCCTAA	5
CCTTTC	5
CGGAGG	5
CTCCAA	5
GAAAAT	5
GAATAT	5
GAGCCT	5
GATGGC	5
GATGTG	5
GCAAAT	5
GCACCC	5
GCCTCC	5
GGACAC	5
GGAGAT	5
GGCTGT	5
GGGGTG	5
GGGTAC	5
GGGTGT	5
GGGTTA	5
GGGTTG	5
TATATC	5
TCCACC	5
TCTATA	5
TCTCTA	5
TGTCCG	5
TGTTTT	5
TTCTTG	5
TTGGTG	5
TTTGAA	5
TTTGAG	5
TTTGGC	5
AAAATC	4
AAACCC	4
AAAGGA	4
AATATG	4
AATTAT	4
AATTCC	4
ACGGAC	4
AGAGGA	4
AGCCTG	4
AGCTTG	4
ATAATT	4
ATATAC	4
ATATGT	4
ATCACC	4
ATCCAA	4
ATCTAT	4
ATTTTA	4
CAACAC	4
CAAGAG	4
CAATCA	4
CACTAC	4
CACTCC	4
CAGCCT	4
CATATA	4
CATCAC	4
CATTCC	4
CATTGC	4
CCAACC	4
CCAACT	4
CCCGCA	4
CCCTTT	4
CCGCCA	4
CCGTAC	4
CCGTAT	4
CGCCAT	4
CGTACC	4
CTAACC	4
CTAGCA	4
CTCCAT	4
CTCCCA	4
CTCCCT	4
CTCTGC	4
CTCTTG	4
GAAAAG	4
GAACTT	4
GAAGAG	4
GACACG	4
GAGAAA	4
GAGATA	4
GATGAG	4
GCAAAG	4
GCACCA	4
GGAGAA	4
GGAGGC	4
GGATAC	4
GGATGT	4
GGGGAT	4
GGTGTG	4
GGTTTG	4
GTGGGT	4
GTTGGT	4
TATACA	4
TCAATC	4
TCACCC	4
TCCATC	4
TCCCCG	4
TCCCCT	4
TCTCAC	4
TCTCTG	4
TCTGAG	4
TGAAAT	4
TGAATA	4
TGGAAA	4
TGGAAT	4
TTCAAA	4
TTCAAC	4
TTGATT	4
TTTTGG	4
AAACCA	3
AAAGCA	3
AACATG	3
AACTCT	3
AAGAAC	3
AAGAGA	3
AAGAGG	3
AAGATG	3
AAGCCC	3
AATAAC	3
AATCAC	3
AATCCA	3
AATTTC	3
ACAAAC	3
ACACCA	3
ACATTC	3
ACCCGC	3
ACGACC	3
ACTACC	3
ACTCAC	3
ACTTTC	3
AGAAAG	3
AGAGAC	3
AGAGAT	3
AGAGTG	3
AGATGA	3
AGCCTC	3
AGCTCC	3
AGTAAC	3
ATATAA	3
ATCTCA	3
ATGAAC	3
ATGGGT	3
ATGGTG	3
ATTCTC	3
CAAATT	3
CAACCA	3
CAACCC	3
CAAGTT	3
CAATCT	3
CACAAT	3
CACAGC	3
CACCCC	3
CACCGC	3
CATCTA	3
CCAAAG	3
CCAACA	3
CCAAGC	3
CCCAAT	3
CCCACA	3
CCCCAC	3
CCCTCT	3
CCGCCT	3
CCTTTT	3
CGATGG	3
CGGACA	3
CGGGGA	3
CGGGTG	3
CGGTGG	3
CGGTTG	3
CTACCA	3
CTCACT	3
CTGCAT	3
CTTCGT	3
CTTGGC	3
GAACCA	3
GAAGGA	3
GAATGA	3
GAATTT	3
GACATG	3
GACTCA	3
GAGGAT	3
GAGGCG	3
GAGGGA	3
GAGGGG	3
GAGGGT	3
GAGGTA	3
GAGTGA	3
GAGTGG	3
GATGGA	3
GATTGA	3
GCCACT	3
GCCTCT	3
GCGATG	3
GCGGTG	3
GCGGTT	3
GCTCCC	3
GCTGAG	3
GGAGTG	3
GGGCTT	3
GGGGAG	3
GGGGCG	3
GGGGTT	3
GGTCGG	3
GGTGAA	3
GTGAGG	3
GTGATG	3
GTGGTA	3
GTGTGG	3
TAGATA	3
TAGCAG	3
TATGTA	3
TCACTC	3
TCCAAA	3
TCCTCT	3
TCGGGG	3
TCTACT	3
TCTATC	3
TCTCCC	3
TGAAAA	3
TGAGAG	3
TGAGAT	3
TGAGCC	3
TGATTG	3
TGCTAG	3
TGGGGG	3
TGGTGT	3
TGTCTC	3
TGTGAA	3
TGTGGC	3
TGTGTA	3
TGTGTT	3
TGTTAC	3
TTCAAG	3
TTCATC	3
TTGGGC	3
TTGGGG	3
TTTCAT	3
TTTCCA	3
TTTGAT	3
TTTGGA	3
TTTGTG	3
TTTTAA	3
AAAATG	2
AAACCG	2
AAAGGC	2
AAAGTG	2
AAATAT	2
AAATCC	2
AAATCT	2
AAATTG	2
AACAAT	2
AACAGT	2
AACCCC	2
AAGGGG	2
AATACT	2
AATATA	2
AATCAA	2
AATCAT	2
AATTAA	2
ACACAA	2
ACACAG	2
ACACAT	2
ACCAAA	2
ACCAAC	2
ACCCCT	2
ACCCGT	2
ACCCTA	2
ACCGCA	2
ACGGAT	2
ACGGGG	2
ACTCCG	2
AGAAGC	2
AGAGGC	2
AGATGG	2
AGCACA	2
AGCCCA	2
AGCCCT	2
AGCGGG	2
AGCTGG	2
AGGAAA	2
AGGAGA	2
AGGATT	2
AGGCAA	2
AGGGTG	2
AGTGAG	2
AGTTCG	2
ATAATG	2
ATACCC	2
ATAGAG	2
ATATTC	2
ATATTT	2
ATCAAA	2
ATCAAG	2
ATGATA	2
ATGGAG	2
ATGGCA	2
ATGTAT	2
ATTATA	2
ATTCAA	2
ATTGGG	2
ATTTTC	2
CAACAG	2
CAACCG	2
CAATTC	2
CAATTT	2
CACAAC	2
CACACT	2
CACCTT	2
CACTGC	2
CAGAGG	2
CAGTAC	2
CATAAA	2
CATCAG	2
CATCGC	2
CATGCT	2
CCAAAC	2
CCAAAT	2
CCAACG	2
CCAAGT	2
CCACAC	2
CCACAG	2
CCACGT	2
CCACTC	2
CCAGAA	2
CCAGCA	2
CCCCAA	2
CCCCCG	2
CCCTCA	2
CCCTCC	2
CCCTGC	2
CCTAAA	2
CCTCAT	2
CCTCCC	2
CCTCCG	2
CCTCTG	2
CGAAGA	2
CGCACC	2
CGCCCC	2
CGCTAC	2
CGGTGA	2
CGTCCC	2
CGTCCT	2
CGTGGT	2
CTCAAT	2
CTCATC	2
CTCCTA	2
CTCCTT	2
CTCTTT	2
CTGATG	2
CTGTTA	2
CTTCAA	2
CTTCAT	2
CTTCTC	2
CTTGGA	2
CTTTCA	2
CTTTCT	2
CTTTTC	2
GAAAGG	2
GACCAC	2
GACCTC	2
GACGGG	2
GACTGA	2
GAGACA	2
GAGACG	2
GAGGGC	2
GAGTTG	2
GATACG	2
GATGAA	2
GATGGG	2
GCAGAA	2
GCATTT	2
GCCATC	2
GCGGAG	2
GCTTGT	2
GGAAAA	2
GGACAT	2
GGACGG	2
GGAGCT	2
GGCAAG	2
GGCGAA	2
GGCGTT	2
GGGAAA	2
GGGAAT	2
GGGAGA	2
GGGGAA	2
GGGGTA	2
GGGTGA	2
GGTGCG	2
GGTGCT	2
GGTTAT	2
GGTTGT	2
GTAGAG	2
GTATCT	2
GTCCAA	2
GTCCTC	2
GTGAGT	2
GTGCAT	2
GTGGTT	2
GTGTCC	2
GTGTCG	2
GTGTGA	2
GTTACT	2
GTTGAA	2
GTTGGG	2
GTTTGG	2
TAACAG	2
TAACCA	2
TAAGAG	2
TACATC	2
TACTGC	2
TAGAAG	2
TATAAT	2
TATCTC	2
TATGAA	2
TATGAC	2
TATTTA	2
TCAAAC	2
TCAACT	2
TCAAGT	2
TCACAC	2
TCACCA	2
TCACCG	2
TCATTC	2
TCATTT	2
TCCGTG	2
TCCTTC	2
TCGAAA	2
TCGACT	2
TCGCCC	2
TCTCCT	2
TCTGCC	2
TCTTGA	2
TCTTGT	2
TGAACA	2
TGAAGT	2
TGAATC	2
TGAATT	2
TGATGT	2
TGATTT	2
TGCTTC	2
TGGCTA	2
TGGGTT	2
TGTATA	2
TGTTGA	2
TGTTGG	2
TTAAAA	2
TTATGT	2
TTATTG	2
TTCACC	2
TTCACT	2
TTCCCT	2
TTCTCC	2
TTCTGA	2
TTGAAT	2
TTGAGC	2
TTGCTT	2
TTGGAG	2
TTGGTA	2
TTGGTT	2
TTGTGC	2
TTTACC	2
TTTAGG	2
TTTGGG	2
TTTTAG	2
AAACCT	1
AAAGAT	1
AAAGGG	1
AAATGA	1
AAATGC	1
AAATGG	1
AAATGT	1
AAATTC	1
AAATTT	1
AACAAG	1
AACAGC	1
AACATC	1
AACCAC	1
AACCAG	1
AACTGA	1
AAGCAA	1
AAGGAA	1
AAGGAG	1
AAGGCA	1
AAGGTG	1
AAGGTT	1
AAGTAC	1
AAGTAG	1
AAGTCG	1
AAGTGG	1
AATAGC	1
AATAGG	1
AATATT	1
AATCAG	1
AATCTC	1
AATCTG	1
AATGAA	1
AATGGT	1
AATTGC	1
AATTGG	1
AATTTA	1
ACAAAG	1
ACAACC	1
ACAAGA	1
ACAATC	1
ACACCT	1
ACACGC	1
ACAGAC	1
ACAGAT	1
ACAGCA	1
ACATAT	1
ACATGA	1
ACATGC	1
ACATGG	1
ACCAAT	1
ACCACA	1
ACCACG	1
ACCATG	1
ACCCAA	1
ACCCAC	1
ACCCAG	1
ACCCCA	1
ACCCCC	1
ACCGGA	1
ACCTAC	1
ACCTCA	1
ACCTCT	1
ACCTTC	1
ACGAAC	1
ACGAAG	1
ACGATG	1
ACGGGC	1
ACGGGT	1
ACGTCA	1
ACGTCC	1
ACTCCA	1
ACTCCC	1
ACTCCT	1
ACTGCC	1
ACTGGG	1
ACTTCC	1
ACTTGC	1
ACTTGG	1
ACTTTT	1
AGAACA	1
AGAAGT	1
AGACAC	1
AGACAG	1
AGACGC	1
AGAGTT	1
AGATAT	1
AGCAAG	1
AGCACC	1
AGCAGA	1
AGCATC	1
AGCCAC	1
AGCCCC	1
AGCCGA	1
AGCTGA	1
AGCTTC	1
AGGACA	1
AGGATC	1
AGGCTG	1
AGGGCA	1
AGGGGA	1
AGGGGG	1
AGGTGC	1
AGGTTC	1
AGGTTT	1
AGTAGA	1
AGTGGC	1
AGTGGG	1
AGTGGT	1
AGTGTG	1
AGTTAG	1
AGTTAT	1
AGTTGA	1
AGTTGC	1
ATAAAT	1
ATAACC	1
ATAACG	1
ATAACT	1
ATACCA	1
ATAGGC	1
ATAGTC	1
ATATGA	1
ATATGG	1
ATCAAC	1
ATCAAT	1
ATCACA	1
ATCAGA	1
ATCATA	1
ATCCAC	1
ATCCAT	1
ATCCCC	1
ATCCGT	1
ATCGCT	1
ATCGTC	1
ATCTAC	1
ATCTGA	1
ATCTGT	1
ATCTTC	1
ATGAAA	1
ATGAAT	1
ATGCAC	1
ATGCAG	1
ATGCCA	1
ATGGAA	1
ATGGAT	1
ATGGCG	1
ATGGGA	1
ATGTCA	1
ATGTCT	1
ATGTGA	1
ATGTTC	1
ATGTTG	1
ATTAAT	1
ATTACC	1
ATTATC	1
ATTATG	1
ATTCAC	1
ATTCTT	1
ATTGAA	1
ATTGCC	1
ATTGCT	1
ATTGGA	1
ATTGTG	1
ATTGTT	1
ATTTAT	1
ATTTGA	1
CAAAAG	1
CAAACT	1
CAAAGC	1
CAACCT	1
CAACTC	1
CAACTT	1
CAAGAC	1
CAAGGG	1
CAAGTC	1
CAAGTG	1
CAATAC	1
CAATCC	1
CAATGC	1
CAATGG	1
CAATTG	1
CACAAG	1
CACACG	1
CACAGT	1
CACATA	1
CACATT	1
CACCAG	1
CACCCG	1
CACCGT	1
CACCTA	1
CACGCC	1
CACTAT	1
CACTCA	1
CACTGT	1
CACTTC	1
CAGACT	1
CAGCAC	1
CAGCTC	1
CAGGAG	1
CAGTAG	1
CAGTCA	1
CAGTCT	1
CAGTGA	1
CAGTGT	1
CATATT	1
CATCAA	1
CATCCA	1
CATCCC	1
CATCCT	1
CATCTC	1
CATGAA	1
CATGTC	1
CATGTG	1
CATTCT	1
CATTTC	1
CATTTG	1
CCAAAA	1
CCAATG	1
CCAATT	1
CCACAT	1
CCACTA	1
CCAGCC	1
CCATAA	1
CCATCC	1
CCATCG	1
CCATCT	1
CCATGC	1
CCATTC	1
CCCAAC	1
CCCACG	1
CCCCAT	1
CCCCGA	1
CCCCGC	1
CCCCGG	1
CCCCTA	1
CCCCTC	1
CCCCTT	1
CCCGAC	1
CCCGAG	1
CCCGCC	1
CCCGTC	1
CCCGTT	1
CCCTAC	1
CCCTAT	1
CCGTCC	1
CCGTGA	1
CCTACT	1
CCTCAC	1
CCTCAG	1
CCTCTA	1
CCTGAA	1
CCTGAG	1
CCTGCT	1
CCTGTC	1
CCTTCT	1
CCTTTG	1
CGAACT	1
CGAAGT	1
CGACCT	1
CGAGCC	1
CGAGGG	1
CGAGGT	1
CGAGTT	1
CGATGA	1
CGATGC	1
CGCACA	1
CGCCAA	1
CGCCGA	1
CGCCTC	1
CGCGGT	1
CGCTCC	1
CGGCGA	1
CGGCTA	1
CGGGAG	1
CGGGCT	1
CGGGGC	1
CGGGGG	1
CGTATC	1
CGTCAT	1
CGTCGG	1
CGTCTG	1
CGTGGG	1
CGTGTT	1
CTAAAC	1
CTAATT	1
CTACCC	1
CTACCT	1
CTATCT	1
CTATGC	1
CTCAAC	1
CTCACA	1
CTCACC	1
CTCCGC	1
CTCCTG	1
CTCGAA	1
CTCTCG	1
CTGCGG	1
CTGCTT	1
CTGGCA	1
CTGGGG	1
CTGGTG	1
CTGTCT	1
CTGTTG	1
CTGTTT	1
CTTCAC	1
CTTCCC	1
CTTCCT	1
CTTCTA	1
CTTCTG	1
CTTGAC	1
CTTGAG	1
CTTGCC	1
CTTGTC	1
CTTGTT	1
CTTTGG	1
CTTTGT	1
CTTTTG	1
GAAAGA	1
GAAATC	1
GAAATG	1
GAACCC	1
GAACGA	1
GAAGGT	1
GAAGTC	1
GAAGTT	1
GAATAG	1
GAATCG	1
GAATTG	1
GACAAG	1
GACACA	1
GACACT	1
GACCAA	1
GACCCC	1
GACCCT	1
GACGAG	1
GACGAT	1
GACGCC	1
GACGGA	1
GACGTG	1
GACTAT	1
GACTTG	1
GAGAAG	1
GAGATT	1
GAGCCA	1
GAGCGA	1
GAGCTT	1
GAGGAA	1
GAGGCA	1
GAGGTT	1
GAGTGC	1
GAGTTT	1
GATAGT	1
GATATG	1
GATATT	1
GATGAC	1
GATTAG	1
GATTTA	1
GATTTC	1
GCAAAA	1
GCAACA	1
GCAACC	1
GCAAGA	1
GCAATG	1
GCACAC	1
GCAGGG	1
GCAGTG	1
GCATAG	1
GCCAAC	1
GCCAAG	1
GCCCAC	1
GCCCGA	1
GCCGAT	1
GCCTGA	1
GCCTTC	1
GCCTTG	1
GCGAGG	1
GCGTGT	1
GCGTTG	1
GCTGAT	1
GCTGGA	1
GCTGGG	1
GCTGGT	1
GCTGTG	1
GCTGTT	1
GGAAAC	1
GGAATC	1
GGAATG	1
GGACGT	1
GGAGCA	1
GGAGTA	1
GGATGA	1
GGATTT	1
GGCAAT	1
GGCAGG	1
GGCAGT	1
GGCCCA	1
GGCGGG	1
GGCGTC	1
GGCTAC	1
GGCTAG	1
GGCTCA	1
GGCTGG	1
GGCTTT	1
GGGAAG	1
GGGACG	1
GGGATT	1
GGGCAC	1
GGGCCG	1
GGGCGG	1
GGGCTC	1
GGGCTG	1
GGGGAC	1
GGGGCT	1
GGGGGC	1
GGGGTC	1
GGGTCG	1
GGGTGC	1
GGGTGG	1
GGGTTC	1
GGTAAC	1
GGTACC	1
GGTACG	1
GGTAGA	1
GGTAGC	1
GGTATG	1
GGTGAT	1
GGTGTA	1
GGTGTT	1
GGTTCC	1
GGTTCT	1
GGTTGC	1
GTAAAA	1
GTAAAG	1
GTACCC	1
GTAGTG	1
GTATCC	1
GTCAAT	1
GTCACA	1
GTCATT	1
GTCCCA	1
GTCTCT	1
GTCTGC	1
GTGAGA	1
GTGATT	1
GTGCCT	1
GTGCTA	1
GTGGAA	1
GTGGAT	1
GTGGGC	1
GTGGGG	1
GTGGTC	1
GTGTTG	1
GTGTTT	1
GTTAGA	1
GTTATT	1
GTTCAC	1
GTTCAT	1
GTTCCG	1
GTTCTA	1
GTTGAT	1
GTTGCG	1
GTTGCT	1
GTTTGA	1
GTTTGT	1
GTTTTA	1
GTTTTG	1
TAAAAG	1
TAAACC	1
TAAATA	1
TAAATC	1
TAAATT	1
TAACAA	1
TAACAC	1
TAACCG	1
TAAGTC	1
TAATAC	1
TAATAG	1
TAATCC	1
TAATTT	1
TACATA	1
TACCTC	1
TACGGA	1
TACTAT	1
TACTCT	1
TACTGG	1
TAGAGA	1
TAGATG	1
TAGATT	1
TAGCCA	1
TAGGAG	1
TAGGCG	1
TAGGGC	1
TAGGTG	1
TAGTGA	1
TAGTGG	1
TATATT	1
TATCCA	1
TATGGC	1
TATTAC	1
TATTAG	1
TCAAAA	1
TCAAAT	1
TCAACC	1
TCAATG	1
TCAGAC	1
TCAGAT	1
TCAGGG	1
TCATAT	1
TCATCC	1
TCATTA	1
TCCACA	1
TCCACT	1
TCCATG	1
TCCCAA	1
TCCCAG	1
TCCCCA	1
TCCCGC	1
TCCGCC	1
TCCGGC	1
TCCGTA	1
TCCTAT	1
TCCTCA	1
TCCTTT	1
TCGAAC	1
TCGAAG	1
TCGAGT	1
TCGCCT	1
TCGTCA	1
TCGTTC	1
TCGTTT	1
TCTAAA	1
TCTAAC	1
TCTAGC	1
TCTGAC	1
TCTGGT	1
TCTTCG	1
TGAAAC	1
TGAAAG	1
TGAAGG	1
TGAGAA	1
TGAGCT	1
TGAGGT	1
TGAGTT	1
TGATCC	1
TGATTA	1
TGATTC	1
TGCAAC	1
TGCACA	1
TGCAGG	1
TGCATG	1
TGCCAT	1
TGCCCC	1
TGCCCT	1
TGCCGA	1
TGCCTC	1
TGCGGT	1
TGCGTG	1
TGCTAA	1
TGCTCA	1
TGCTCG	1
TGCTCT	1
TGCTGT	1
TGCTTT	1
TGGAAC	1
TGGAAG	1
TGGAGT	1
TGGCAA	1
TGGCCT	1
TGGCTC	1
TGGCTG	1
TGGCTT	1
TGGGAG	1
TGGGCC	1
TGGGGA	1
TGGGGT	1
TGGGTA	1
TGGGTC	1
TGGTCG	1
TGGTGC	1
TGGTTG	1
TGGTTT	1
TGTATC	1
TGTATG	1
TGTCCA	1
TGTGAT	1
TGTGCA	1
TGTGCT	1
TGTGGT	1
TGTTCT	1
TGTTTG	1
TTAAAT	1
TTAGGT	1
TTATAT	1
TTCACA	1
TTCAGG	1
TTCATA	1
TTCCAA	1
TTCCCA	1
TTCCTC	1
TTCGCC	1
TTCGGG	1
TTCGTC	1
TTCTCA	1
TTCTGC	1
TTCTGG	1
TTGAAC	1
TTGAAG	1
TTGAGA	1
TTGAGG	1
TTGAGT	1
TTGATG	1
TTGCAG	1
TTGCGG	1
TTGGAA	1
TTGGCC	1
TTGGCG	1
TTGGTC	1
TTGTAT	1
TTGTGT	1
TTGTTA	1
TTTAAA	1
TTTATA	1
TTTATC	1
TTTCCT	1
TTTCTC	1
TTTCTG	1
TTTGCG	1
TTTTGC	1
